# Supplementary material for: Dietary sugar intake among preschool-aged children: a cross-sectional study
Source: PubMed Central journal article supplement — CMAJ Open. 2021 Sep 14;9(3):E855–63. doi: 10.9778/cmajo.20200178 (PMC8445636; doi:10.9778/cmajo.20200178), 2021-09-14
Supplement: open-2020-0178-original-submission.pdf [file open-2020-0178-original-submission.pdf]

**Dietary Sugar Intake among Preschool-aged Children: Cross-sectional Associations of Intake of Total, Added and Free Sugar with Anthropometric Measures**

Anisha Mahajan MPH, RD<sup>1</sup>

Jessica Yu BSc<sup>1</sup>

Jaimie L Hogan BSc<sup>1</sup>

Kira Jewell MSc<sup>2</sup>

Alex Carriero BSc<sup>1</sup>

Angela Annis MSc<sup>3</sup>

Adam Sadowski MMath<sup>3</sup>

Gerarda Darlington PhD<sup>4</sup>

Andrea C. Buchholz PhD, RD<sup>2</sup>

Alison M. Duncan PhD, RD<sup>1</sup>

Jess Haines PhD, RD<sup>2</sup>

David W.L. Ma PhD<sup>1</sup>

and on behalf of the Guelph Family Health Study

<sup>1</sup>Department of Human Health and Nutritional Sciences, University of Guelph

<sup>2</sup>Department of Family Relations and Applied Nutrition, University of Guelph

<sup>3</sup>Guelph Family Health Study, University of Guelph

<sup>4</sup>Department of Mathematics and Statistics, University of Guelph

Correspondence to: David WL Ma, University of Guelph, 50 Stone Road East, Guelph, Ontario N1G 2W1; [davidma@uoguelph.ca](mailto:davidma@uoguelph.ca); Tel: 519-824-4120 Ext. 52272

Competing Interests: None declared

Funding agencies: This research was funded by Heart and Stroke Foundation of Canada and Health for Life Initiative at the University of Guelph; however, neither of the organizations had any role in the project design, data collection, analyses, interpretation of data, or writing of the manuscript.

## Abstract

**Background:** Excessive intake of sugar in young children is a public health concern. The objectives of our study were to examine children's intakes of total, free and added sugar and to investigate their cross-sectional associations with body weight, BMI Z-scores, percent fat mass and waist circumference among preschool-aged children.

**Methods:** The study sample included n=109 children (77 families) between the ages of 1.5 to 5 years. Total sugar daily intake was determined using ESHA Food Processor software; free and added sugar daily intakes and food sources were determined through manual inspection of 3-day food records. Anthropometric measures were completed by trained research staff. Linear regression models with generalized estimating equations were used to estimate associations between sugar intakes and anthropometric measures.

**Results:** Mean daily intakes  $\pm$  standard deviation (SD) were  $86 \pm 26$  g;  $31 \pm 15$  g and  $26 \pm 13$  g for total, free and added sugar, respectively. Approximately 80% of children had free sugar intakes greater than the 5% of daily energy recommendation by the World Health Organization. The most frequent food sources of free and added sugar consumed were bakery products (e.g., cakes, cookies and breads). A weak inverse association between free sugar and waist circumference ( $\beta = -0.02$ ; 95% CI =  $-0.04, -0.0009$ ), was found but no significant associations were found between sugar and other anthropometric measures.

**Interpretation:** Free and added sugar intake of the majority of preschool-aged children in our study exceeds current recommendations. Further investigation into long-term sugar intake and association with anthropometric measures among preschool-aged children is warranted.

## 1 Introduction

2 Dietary patterns that begin in early childhood can continue into adulthood and thus, early years are  
3 crucial for nutrition interventions and habit formation.<sup>1</sup> Infants have a natural affinity towards sweet  
4 foods overall and also pre- and post-natal exposures are important.<sup>2,3</sup> Genetic, parental and cultural  
5 influences can increase preferences for sugary foods in children.<sup>2</sup> However, there is a lack of high quality  
6 research data on the dietary intake of sugars among young Canadian children, especially infants and  
7 toddlers.<sup>4</sup> Given that cardiometabolic risk markers may begin to emerge as young as 3 years of age,<sup>5</sup> it  
8 is important to understand sugar intake patterns and explore associations between intake of sugar and  
9 cardiometabolic risk markers (including anthropometric measures) in early life. This information will  
10 help inform policy and behavior change interventions focused on early prevention.

11  
12 Adverse effects of excessive sugar intake are a cause for global public health concern in all age groups.<sup>6</sup>  
13 Overconsumption of sugar has been associated with increased risk of excessive weight gain, dental  
14 decay, poor diet quality and nutritional inadequacy in children and adolescents <19y.<sup>4,7,8</sup> Excessive sugar  
15 intake has also been implicated in the development of high blood pressure and lipid abnormalities in  
16 children,<sup>4</sup> which can lead to earlier presentation of non-communicable diseases in children than seen in  
17 previous generations.<sup>5</sup> In the majority of studies, sugar sweetened beverages (SSBs) are the primary  
18 source of dietary sugar intake among children and adolescents that has been studied.<sup>9</sup> One study found  
19 that SSB consumption in the first year of life was associated with a 13% increase in risk of being  
20 overweight at 8 years of age.<sup>10</sup> Recently, a study found higher intakes of SSBs and 100% fruit juices to  
21 be associated with increased risk of cardiometabolic risk factors in preschool-aged children.<sup>11</sup> Contrary  
22 to these findings, there are studies that have found no significant associations between SSB intake and  
23 body weight or body mass index (BMI) Z-scores in preschool-aged and school children.<sup>10,12</sup> Given these  
24 mixed findings and the primary focus on SSBs, we embarked on our research study using detailed dietary  
25 assessments to more broadly examine sources of sugar intake to understand associations between dietary  
26 sugar intake and anthropometric measures in preschool-aged children. Our study objectives were two-  
27 fold. Firstly, to examine the daily intakes of total sugar, free sugar and added sugar, and the key food  
28 sources (by category) of free and added sugar among a sample of preschool-aged children. Secondly, to  
29 examine cross-sectional associations between intakes of total, free and added sugar with anthropometric  
30 measures, including body weight, BMI Z-scores, body weight, waist circumference and percent body  
31 fat among a sample of preschool-aged children in the Guelph Family Health Study (GFHS) pilot studies.  
32 We hypothesized that free and added sugar intake in preschool-aged children would be positively  
33 associated with all anthropometric measures.

## 34 Methods

### 35 Study Design and Participant Recruitment

36 The Guelph Family Health Study (GFHS) is a family-based lifestyle intervention study, initiated in 2014  
37 at the University of Guelph (REB#:17-07-003). The current study includes cross-sectional data gathered  
38 from preschool-aged children from the GFHS pilot studies at baseline from 2014 to 2016.<sup>13</sup> Families  
39 with at least one child aged 18 months to 5 years, who were not planning to move within the next year  
40 were recruited from the Guelph-Wellington areas through the Family Health team, Community Health  
41 Centre and Ontario Early Years Centres.<sup>13</sup> A total of n=117 (83 families) participants were enrolled in  
42 the pilots. Participants were excluded from analyses if food records were incomplete (n=4) or if  
43 breastfeeding replaced a meal and/or exceeded 50 mins or >625mL of breastmilk per day (n=4). Thus,  
44  
45  
46  
47  
48  
49  
50  
51  
52  
53  
54  
55  
56  
57  
58  
59  
60

1  
2  
3 1 our final analytic study sample included 109 preschool-aged children (55 females; 54 males) from 77  
4 2 families.  
5 3

## 6 4 **Study Measures**

### 7 5 8 6 **Intake and Sources of Sugar**

9  
10  
11 7 Total, free and added sugar intakes were assessed from the analysis of 3-day food records (2 weekdays  
12 8 and 1 weekend day). Parents were given paper food record forms, on which they recorded their  
13 9 child(ren)'s food and drink consumption, including amount and occasion of consumption, brand names  
14 10 of products, and recipes for mixed foods. Food record data were entered into ESHA Food Processor  
15 11 software for analysis of 3-day average nutrient intakes (Version 11.6.441, Salem, OR, 2015). Total sugar  
16 12 intake was analyzed by ESHA Food Processor; however, added sugar and free sugar intakes were  
17 13 determined through manual calculations and review of product and SMART LABEL websites. We  
18 14 adapted the algorithm of Louie and colleagues,<sup>14</sup> which included a standardized, objective and stepwise  
19 15 approach to calculate content of added sugar (including honey and syrups) and free sugar (including  
20 16 foods with added sugar and 100% fruit juice and concentrates).<sup>14</sup> This calculation has been used in other  
21 17 studies that investigated free sugar intake in preschoolers.<sup>15,16</sup> These manual calculations were  
22 18 performed by two data analysts to assure data quality. There are limitations in the research literature  
23 19 such as inconsistent definitions of free and added sugar<sup>12</sup> and limited food composition databases that  
24 20 calculate added and free sugar amounts.<sup>15</sup> Total, free, and added sugar intakes were normalized to grams  
25 21 (g) per 1000 kcal/day for ease of comparison in the regression analysis. To identify free and added sugar  
26 22 sources, we adapted the categorization system used by Bernstein and colleagues.<sup>17</sup> Approximately 17  
27 23 broad free and added sugar food groups were used to classify the sources consumed by our study  
28 24 population.<sup>17</sup> The food records were reviewed to classify combined or stand-alone food items into free  
29 25 and added sugar food categories.  
30 26  
31 27

### 32 28 **Anthropometrics**

33 29 Anthropometric outcome variables included waist circumference (WC), height, body weight, percent fat  
34 30 mass and BMI Z-scores. Anthropometric measures were completed by trained research staff.  
35 31 Participants were instructed to remove any footwear and outer garments before measurements were  
36 32 taken. WC (cm) was measured at the top of the iliac crest of participants' bare abdomen, using a non-  
37 33 elastic tape measure (Gulick II™, Country Technology Inc., Gay Mills, Wisconsin). Height (cm) was  
38 34 measured using a child stadiometer. Height and WC were measured in duplicate; if the values were  
39 35 within 0.5 cm, then a mean value was calculated. Otherwise, a third measurement was taken and the  
40 36 mean of the two closest values was calculated. Body weight (kg) was measured using an electronic  
41 37 weighing scale. BMI Z-scores were calculated using the R package zscorer.<sup>18,19</sup> Percent fat mass was  
42 38 assessed using supine tetrapolar bioelectrical impedance analysis (BIA). Participants were instructed to  
43 39 avoid food/drink and vigorous physical activity for 30 minutes prior to the BIA assessment. Percent fat  
44 40 mass was calculated using Kushner and colleagues' total body water formula and Fomon and colleagues'  
45 41 hydration constants.<sup>20,21</sup>  
46 42  
47 43

### 48 44 **Data Analysis**

49 45 Data were analyzed using SAS® University Edition version 9.4 (SAS Institute Inc., Cary, NC).  
50 46 Descriptive statistics were used to summarize children's sugar intake and to compare children's sugar  
51 47  
52 48  
53 49  
54 50  
55 51  
56 52  
57 53  
58 54  
59 55  
60 56

1 intake in our sample to the recommendations of the World Health Organization and American Heart  
2 Association. Linear regression models using generalized estimating equations (GEE's) were fitted to  
3 estimate associations between sugar intake and anthropometric measures. GEE's were used to account  
4 for any dependence between sibling participants,<sup>22</sup> and to attain 95% confidence intervals for  
5 categories of sugar sources. The variables age and sex were identified as potential confounders and  
6 controlled for in the models that explored associations between sugar intake and children's body  
7 weight, fat mass, and waist circumference.

## 8 **Results**

### 9 **Demographic characteristics**

10  
11  
12  
13 Among our sample of 109 children, the mean age was  $3.67 \pm 1.24$  years and 84% of the participants  
14 were Caucasian. Approximately 61% of parents reported their annual household income  $> \$80,000$  and  
15 41% had completed postgraduate training or degrees (Table 1).

### 16 **Sugar intake amounts and percent of total energy**

17  
18  
19 Sugar intakes (mean (g)  $\pm$  SD) were  $86 \pm 26$  (21.5 teaspoons) for total sugars,  $31 \pm 15$  (7.75 teaspoons)  
20 for free sugars and  $26 \pm 13$  (6.5 teaspoons) for added sugars. Relative to percent of total energy, 80%  
21 of children had free sugar intakes that exceeded the 5% lower limit recommendation set by the World  
22 Health Organization (WHO)<sup>6</sup> and followed by Health Canada<sup>23</sup> (Supplementary materials: Table 1)  
23 and 32% of children had free sugar intakes that exceeded the upper 10% recommendation (Figure 1).<sup>6</sup>  
24 Furthermore, 20.2% of children had added sugar intake that exceeded the 10% limit as set by the  
25 American Heart Association (AHA) Scientific Statement<sup>24</sup> (Figure 2).

### 26 **Food sources of free and added sugar intakes**

27  
28  
29 We noted that 100%; 77% and 72% of the children in our study sample were consuming foods with  
30 free and added sugar from bakery products; sugars and sweets and cereals and grain products  
31 respectively (Table 2). For free sugar intake, the top three food sources included bakery products (9.1  
32 g; 95% CI 8.0, 10.2), sugars and sweets (7.5 g; 95% CI 6.3, 8.7), similar contributions by cereals and  
33 grain products (4.2 g; 95% CI 3.2 to 5.1) and beverages (10.5 g; 95% CI 8.0, 12.9). For added sugars,  
34 the top three food sources included bakery products (9.1 g; 95% CI 8.0, 10.2), sugars and sweets (7.5  
35 g; 95% CI 6.3, 8.6), cereals and grains (4.2 g; 95% CI 3.2, 5.1) (Table 3).

### 36 **Cross-sectional associations between sugar intakes and anthropometric measures**

37  
38  
39 We found a weak, inverse, statistically significant association between free sugar intake and waist  
40 circumference ( $\beta = -0.02$ ; 95% CI = -0.04, -0.0009 p-value=0.04) (Table 4). No other significant  
41 associations were found between intakes of free, added or total sugar and other anthropometric  
42 measures (Table 4).

### 43 **Interpretation**

44  
45  
46 Our study investigated daily intakes of total, free and added sugar along with key food sources among  
47 preschool-aged children in the GFHS pilot studies. In addition, we examined cross-sectional

1 associations between total, free and added sugar and anthropometric measures. To our knowledge, this  
2 is the first Canadian study to examine cross-sectional associations between dietary sugar intake and  
3 anthropometric measures among preschool-aged children.

4  
5 Children's intake of total sugars (86 g/day) in our sample was below the 2015 Canadian average of  
6 101 g/day or 24 teaspoons for children 2-8 years.<sup>25</sup> This age range might be too large for comparison  
7 as intake of total sugars may change markedly between toddlers, preschoolers and children. The  
8 average added sugar intake of 6.5 teaspoons/day in our sample exceeds the AHA Scientific Statement,  
9 which recommends <6 teaspoons / day for children >2 years and limiting or avoiding added sugar  
10 below 2 years.<sup>24</sup> In 2005, Kranz and colleagues analyzed added sugar consumption for 2 to 5 year old  
11 American children through the Continuing Survey of Food Intake.<sup>26</sup> In this study, the majority of  
12 participants consumed <25% of energy from added sugar, similar to our study sample.<sup>26</sup> Among this  
13 US sample, the top food sources were fruit drinks, high fat desserts and soft drinks,<sup>26</sup> whereas in our  
14 sample bakery products were the top food source. Data from population-based surveys in Canada and  
15 the US suggest that intake of SSB has decreased over the past 10 years, which may explain the  
16 differences in top food sources of sugar intake in our study versus earlier studies with preschoolers.<sup>27,28</sup>

17 A total of 80% of preschool-aged children in our study had a free sugar intake that exceeded the 5%  
18 recommendation and 32%, that exceeded the 10% recommendation set by the WHO.<sup>6</sup> These results  
19 are similar to research by Devenish and colleagues who analyzed free sugar intake among 2-year-old  
20 children in Australia.<sup>16</sup> In this study, 71.1% of children exceeded the 5% of total energy  
21 recommendation and 38% exceeded the less than 10% recommendation.<sup>16</sup> The main free sugar sources  
22 found in their sample were fruit juice, biscuits, cakes, desserts and confectionery, which were similar  
23 to the main free sugar sources we found in our study.<sup>16</sup>

24  
25 Results linking sugar intake with weight gain and obesity in children are conflicting as seen in  
26 systematic reviews.<sup>6</sup> For instance, The Dortmund Nutritional and Anthropometric Longitudinally  
27 Designed (DONALD) Study of 216 participants (0.5 to 7 years)<sup>3</sup> found that a high added sugar intake  
28 in the first 2 years of life was associated with an increased BMI by age 7 years.<sup>3</sup> By contrast, using  
29 NHANES data (1971-1975; 1988-1994) from children aged 1-18 years, no association was found  
30 between total and added sugar with BMI.<sup>29</sup> This study suggested that total energy intake, rather than  
31 a specific nutrient, had a greater impact on children's BMI.<sup>29</sup>

32  
33 There is a paucity of literature on sugar intake and anthropometric measures in preschool-aged  
34 children. While overall the research examining dietary sugar intake has been mixed in children,  
35 evidence shows SSB intake is associated with cardiometabolic risk factors that include waist  
36 circumference and BMI Z-scores in preschool-aged children.<sup>30,31</sup> This is likely due to the increased  
37 energy density in the overall dietary pattern with SSBs intake. Our findings indicated a statistically  
38 significant negative association between free sugar intake and waist circumference (that is not  
39 clinically relevant due to the small regression coefficient estimate) and do not suggest any other  
40 associations of sugar with anthropometric measures.

## 41 42 **Study Limitations**

43  
44 Some limitations should be considered when interpreting our results including that our study sample  
45 consisted of 84% Caucasians and over 61% of participants had an annual household income over  
46 \$80,000; thus, our results may not be generalizable to children from diverse ethnic or low socio-

1  
2  
3 1 economic populations. Parent-reported food records were used to collect dietary data which may be  
4 2 underreporting children's sugar intake data due to social desirability bias or errors in the reporting of  
5 3 children's intake. In Canada, it is not required that companies identify the proportion of added and  
6 4 naturally occurring sugars on nutrition labels. This meant that for some products, such as in infant  
7 5 formula, we were unable to differentiate the free and added sugars in the product. Our added sugar  
8 6 definition was adapted from Louie and colleagues<sup>14</sup> and includes honey and syrups. While this  
9 7 definition is aligned with other research in this field<sup>32</sup> it has been debated<sup>33</sup> as it is not consistent with  
10 8 current WHO and Health Canada definitions (Supplementary materials: Table 1).<sup>6</sup>  
11 9

## 10 **Conclusion**

11  
12 12 The study findings support current recommendations that preschool-aged children should limit free  
13 13 and added sugar intake to establish healthy dietary patterns early in life. While our study does not  
14 14 provide evidence linking sugar intakes and anthropometric measures, most children exceeded the  
15 15 WHO free sugar recommendations. This study can inform healthcare professionals and policy makers  
16 16 about the current consumption patterns of sugars in young children as there is currently limited  
17 17 research available for this age group. Our data regarding key food and beverage sources of sugar intake  
18 18 among preschool-aged children can be used to guide dietary and policy advice for preschool-aged  
19 19 children. Given the limited research examining sugar intake among young children and the impact on  
20 20 cardiometabolic risk factors in early years, further investigation of dietary sugar intake (amount,  
21 21 sources) and longitudinal associations with anthropometric measures are warranted in preschool-aged  
22 22 children.  
23  
24

## 25 **Data Sharing Statement**

26  
27 27 The GFHS welcomes external collaborators. Interested investigators can contact GFHS investigators  
28 28 to explore this option, which preserves participant confidentiality and meets the requirements of our  
29 29 Research Ethics Board, to protect human subjects. Due to Research Ethics Board restrictions and  
30 30 participant confidentiality, we do not make participant data publicly available.  
31  
32

## 33 **Acknowledgements**

34  
35 35 Disclosure: The authors declare no conflict of interest.  
36  
37

38 37 Author contributions: AM conducted and interpreted the data analysis and wrote the manuscript.  
39 38 DWLM and JH are the Co-Directors of the GFHS and supervised this project. GD was the statistical  
40 39 advisor and ACB and AMD were co-advisors for this project. These authors critically evaluated the  
41 40 results of this project. AA assisted with data acquisition and JY, JLH, KJ, AC and AS assisted with  
42 41 data cleaning and data review. All authors reviewed and revised this manuscript.  
43  
44  
45  
46  
47  
48  
49  
50  
51  
52  
53  
54  
55  
56  
57  
58  
59  
60

## References

1. Mikkila V, Rasanen L, Raitakari OT. Consistent dietary patterns identified from childhood to adulthood: The Cardiovascular risk in Young Finns Study. *Br J Nutr.* 2005;93:923-31.
2. Fidler NM, Braeger C, Bronsky J, Campoy C, Domellof M, Embelton N et al. ESPGHAN Committee on Nutrition. Sugar in Infants, Children and Adolescents: A Position Paper of the European Society for Paediatric Gastroenterology, Hepatology and Nutrition Committee on Nutrition. *J Pediatr Gastroenterol Nutr.* 2017;65:681-96.
3. Herbst A, Diethelm K, Cheng G, Alexy U, Icks A, Buyken A. Direction of Associations between Added Sugar Intake in Early Childhood and Body Mass Index at Age 7 Years May Depend on Intake Levels. *J Nutr.* 2011;141:1348-54.
4. Herrick KA, Fryar CD, Hamner HC, Park S, Ogden CL. Added Sugars Intake among US Infants and Toddlers. *J Acad Nutr Diet.* 2020;120(1):23-32. doi.org/10.1016/j.jand.2019.09.007
5. Skinner AC, Perrin EM, Moss LA, Skelton JA. Cardiometabolic Risks and Severity of Obesity in Children and Young Adults. *N Engl J Med.* 2015;373:1307-17.
6. World Health Organization [Internet]. Guideline: Sugars intake for adults and children. Geneva, Switzerland. 2015.
7. Keller A, Della Torre SB. Sugar-Sweetened Beverages and Obesity among Children and Adolescents: A Review of Systematic Literature Reviews. *Child Obes.* 2015;11(4):338-46.
8. Elfassy T, Adjoian T, Lent M. Sugary Drink Consumption Among NYC Children, Youth, and Adults: Disparities Persist Over Time, 2007-2015. *J. Community Health.* 2019;1(2):297-306.
9. Davis JN, Lee S. Chapter 17: Dietary Sugars, Obesity and Chronic Diseases in Children. *Dietary Sugars and Health.* 2014;245-55.
10. Blum JW, Jacobsen DJ, Donnelly JE. Beverage consumption patterns in elementary school aged children across a two-year period. *J Am Coll Nutr.* 2005;24(2):93-8.
11. Eny KM, Jeyakumar N, Dai DWH, Maguire JL, Parkin PC, Birken CS. Sugar-containing beverage consumption and cardiometabolic risk in preschool children. *Prev Med Rep.* 2020;17(101054):1-8.
12. Newby PK, Peterson KE, Berkey CS, Leppert J, Willett WC, Colditz GA. Beverage consumption is not associated with changes in weight and body mass index among low-income preschool-aged children in North Dakota. *J Am Diet Assoc.* 2004;104(7):1086-94.
13. Haines J, Douglas S, Mirotta JA, O’Cane C, Breau R, Walton K et. al. Guelph Family Health Study: pilot study of a home-based obesity prevention intervention. *Can J Public Health.* 2018;109:549-60.
14. Louie JCY, Moshtaghan H, Boylan S, Flood VM, Rangan AM, Barclay AW et al. A systematic methodology to estimate added sugar content of foods. *Eur J Clin Nutr.* 2015;69:154-61. doi:10.1038/ejcn.2014.256
15. Crowe M, O’Sullivan M, Casetti O, O’Sullivan A. Estimation and consumption pattern of free sugar intake in 3-year-old Irish preschool children. *Eur J Clin Nutr.* 2019. doi.org/10.1007/s00394-019-02056-8



1  
2  
3  
4  
5  
6  
7  
8  
9  
10  
11  
12  
13  
14  
15  
16  
17  
18  
19  
20  
21  
22  
23  
24  
25  
26  
27  
28  
29  
30  
31  
32  
33  
34  
35  
36  
37  
38  
39  
40  
41  
42  
43  
44  
45  
46  
47  
48  
49  
50  
51  
52  
53  
54  
55  
56  
57  
58  
59  
60

16. Devenish G, Golley R, Mukhtar A, Begley A, Ha D, Do L et al. Free Sugars Intake, Sources and Determinants of High Consumption among Australian 2-years-olds in the SMILE Cohort. *Nutrients*. 2019; 161(11):1-16. doi:10.3390/nu11010161
17. Bernstein JT, Shermel A, Mills CM, L'Abbe MR. Total and Free Sugar Content of Canadian Prepackaged Foods and Beverages. *Nutrients*. 2016;582(8):1-22. doi:10.3390/nu8090582
18. R Core Team. R: A language and environment for statistical computing. R Foundation for Statistical Computing, Vienna, Austria. Version 3.6.1 (2019-07-05). <http://www.R-project.org/>
19. Mark Myatt and Ernest Guevarra (2019). zscorer: Child Anthropometry z-Score Calculator. R package version 0.3.1. <https://CRAN.R-project.org/package=zscorer>
20. Kushner RF, Schoeller DA, Field CR, Danford L. Is the impedance index ( $ht^2/R$ ) significant in predicting total body water? *Am J Clin Nutr* 1992;56:832-9.
21. Fomon SJ, Haschke F, Ziegler EE, Nelson SE. Body composition of reference children from birth to age 10 years. *Am J Clin Nutr*. 1982;35:1169-75.
22. Liang KY, Zeger SL. Longitudinal data analysis using generalized linear models. *Biometrika* 1986;73:13-22.
23. Health Canada. Canada's Dietary Guidelines for Health Professional's and Policy Makers. 2019. Available: <https://food-guide.canada.ca/static/assets/pdf/CDG-EN-2018.pdf>
24. Vos MB, Kaar JL, Welsh JA, Van Horn LV, Feig DI, Anderson CAM et al. AHA Scientific Statement. Added Sugars and Cardiovascular Risk in Children. A Scientific Statement from the American Heart Association. *Circ* 2017;135:e1017-e34. doi: 10.1161/cir.0000000000000439
25. Langlois K, Garriguet D, Gonzalez A, Sinclair S, Colapinto CK. Statistics Canada. Health Reports. Changes in total sugars consumption among Canadian children and adults. 2019;30(1):10-19.
26. Kranz S, Smicklas-Wright H, Siega-Riz AM, Mitchell D. Adverse effect of high added sugar consumption on dietary intake in American Preschoolers. *J Pediatr*. 2005;146:105-11.
27. Jones AC, Kirkpatrick S, Hammond D. Beverage consumption and energy intake among Canadians analysis of 2004 and 2015 national dietary intake. *BMC Nutr Jour*. 2019; 18:60:1-14.
28. Marriott BP, Hunt KJ, Malek AM, Newman JC. Trends in intake of energy and total sugar from sugar sweetened beverages among children and adults, NHANES 2003-2016. *Nutr*. 2019;11:2004:1-13. doi:10.3390/nu11092004
29. Song AO, Wang Y, Chung CE, Song B, Lee W, Chun OK. Is obesity development associated with dietary sugar intake in the US? *Nutr*. 2012; 28:1137-41. doi:10.1016/j.nut.2012.03.008
30. Kosova EC, Auinger P, Bremner AA. The relationships between sugar-sweetened beverage intake and cardiometabolic markers in young children. *J Acad Nutr Diet*. 2013; 113:2: 219-27.
31. Seferidi P, Millett C, Lavery AA. Sweetened beverage intake in association to energy and sugar consumption and cardiometabolic markers in children. *Ped Obes*. 2018;1:4: 195-203. doi:10.1111/ijpo.12194

1  
2  
3  
4  
5  
6  
7  
8  
9  
10  
11  
12  
13  
14  
15  
16  
17  
18  
19  
20  
21  
22  
23  
24  
25  
26  
27  
28  
29  
30  
31  
32  
33  
34  
35  
36  
37  
38  
39  
40  
41  
42  
43  
44  
45  
46  
47  
48  
49  
50  
51  
52  
53  
54  
55  
56  
57  
58  
59  
60

1 32. Khan TA, Sievenpieper JL. Controversies about sugars: results from systematic reviews  
2 and meta-analyses on obesity, cardiometabolic disease and diabetes. *Eur J Nutr.*  
3 2016;55:S25-S43.  
4 33. Mela DJ, Woolner EM. Perspective: Total, Added or Free? What kind of Sugars Should  
5 We Be Talking About? *Adv Nutr.* 2018;9:63-9. doi.org/10.1093/advances/nmx020

Confidential

1  
2  
3 **Tables and Figures:**  
4  
5  
6  
7  
8  
9

10  
11  
12  
13  
14  
15  
16  
17  
18  
19  
20  
21  
22  
23  
24  
25  
26  
27  
28  
29  
30  
31  
32  
33  
34  
35  
36  
37  
38  
39  
40  
41  
42  
43  
44  
45  
46  
47  
48  
49  
50  
51  
52  
53  
54  
55  
56  
57  
58  
59  
60

Table 1: Characteristics of parents and children participating in Guelph Family Health Study pilot studies at baseline.

| Characteristic                                      | N (%)           |
|-----------------------------------------------------|-----------------|
| <b>Household Income (Canadian)</b>                  |                 |
| Did not answer                                      | 3 (3.9)         |
| <\$39,000                                           | 5 (6.5)         |
| \$40,000-49,999                                     | 6 (7.8)         |
| \$50,000-59,999                                     | 5 (6.5)         |
| \$60,000-69,999                                     | 5 (6.5)         |
| \$70,000-79,999                                     | 6 (7.8)         |
| \$80,000-89,999                                     | 10 (13.0)       |
| >\$90,000                                           | 37 (48.0)       |
| <b>Parent Education</b>                             |                 |
| Postgraduate training or degree                     | 32 (41.5)       |
| University graduate                                 | 30 (39.0)       |
| College graduate                                    | 7 (9.1)         |
| Some university, some college or technical school   | 8 (10.4)        |
| <b>Child Ethnicity</b>                              |                 |
| Caucasian                                           | 92 (84.4)       |
| Other                                               | 17 (15.5)       |
| <b>Child Age in years, Mean <math>\pm</math> SD</b> | 3.67 $\pm$ 1.24 |
| <b>Child Sex</b>                                    |                 |
| Male                                                | 54 (49.5)       |
| Female                                              | 55 (50.5)       |

6  
7  
8  
9  
10  
11  
12  
13  
14  
15  
16  
17  
18  
19  
20  
21  
22  
23  
24  
25  
26  
27  
28  
29  
30  
31  
32  
33  
34  
35  
36  
37  
38  
39  
40  
41  
42  
43  
44  
45  
46  
47  
48  
49  
50  
51  
52  
53  
54  
55  
56  
57  
58  
59  
60

Children Participants (n=109) and Families/Parent (n=77)

Figure 1: Percent of preschool-aged children in the GFHS pilot studies (n= 109) who consume free sugars in the amounts of 0 to <5%, ≥5% to <10%, ≥10% to <25%, ≥25% of total energy

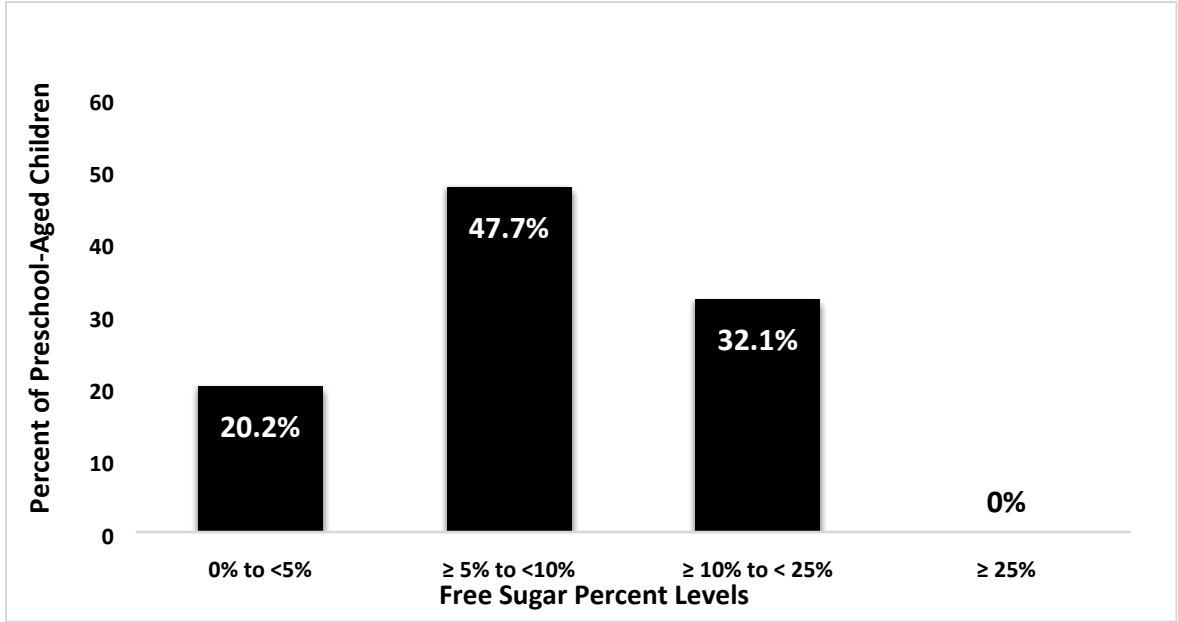

1  
2  
3  
4  
5  
6  
7  
8  
9  
10  
11  
12  
13  
14  
15  
16  
17  
18  
19  
20  
21  
22  
23  
24  
25  
26  
27  
28  
29  
30  
31  
32  
33  
34  
35  
36  
37  
38  
39  
40  
41  
42  
43  
44  
45  
46  
47  
48  
49  
50  
51  
52  
53  
54  
55  
56  
57  
58  
59  
60

1 Figure 2: Percent of preschool-aged children in the GFHS pilot studies (n= 109) who  
2 consume added sugars in the amounts of 0 to <5%, ≥5% to <10%, ≥10% to <25%, ≥25%  
3 of total energy  
4  
5

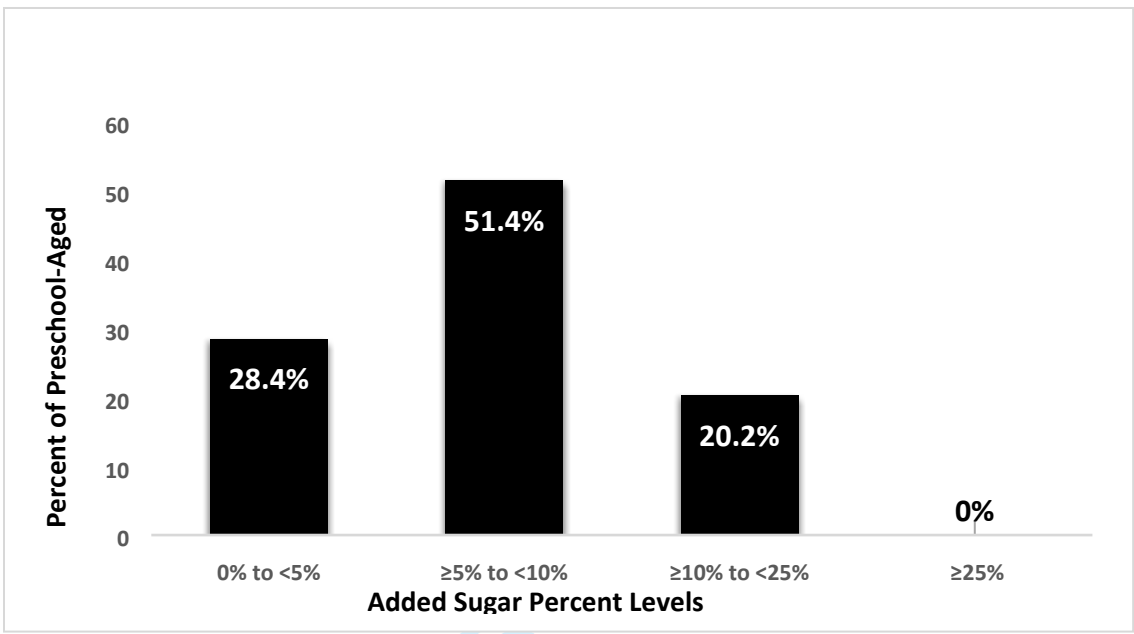

Confidential

1 Table 2: Food source categories contributing to free and added sugar intakes in preschool-aged  
 2 children (n=109) in the GFHS pilot studies.  
 3

| Food source category <sup>1</sup>      | Type of sugar | Percent of Free and Added Sugar intake <sup>2</sup> | n   | Percent of children consuming the category <sup>3</sup> |
|----------------------------------------|---------------|-----------------------------------------------------|-----|---------------------------------------------------------|
| <b>Bakery Products</b>                 | Free Sugar    | 29.6                                                | 109 | 100                                                     |
|                                        | Added Sugar   | 34.9                                                | 109 | 100                                                     |
| <b>Sugars and Sweets</b>               | Free Sugar    | 18.8                                                | 84  | 77                                                      |
|                                        | Added Sugar   | 22.1                                                | 84  | 77                                                      |
| <b>Cereals and Grain Products</b>      | Free Sugar    | 9.4                                                 | 77  | 71.6                                                    |
|                                        | Added Sugar   | 11.1                                                | 77  | 71.6                                                    |
| <b>Beverages</b>                       | Free Sugar    | 23                                                  | 77  | 70.6                                                    |
|                                        | Added Sugar   | 10.5                                                | 51  | 46.8                                                    |
| <b>Dairy Products and Substitutes</b>  | Free Sugar    | 6.4                                                 | 63  | 57.8                                                    |
|                                        | Added Sugar   | 7.5                                                 | 63  | 57.8                                                    |
| <b>Snacks</b>                          | Free Sugar    | 1.4                                                 | 48  | 44                                                      |
|                                        | Added Sugar   | 1.7                                                 | 48  | 44                                                      |
| <b>Sauces, Dips and Condiments</b>     | Free Sugar    | 2.1                                                 | 44  | 41.3                                                    |
|                                        | Added Sugar   | 2.5                                                 | 44  | 41.3                                                    |
| <b>Desserts</b>                        | Free Sugar    | 4.1                                                 | 29  | 26.6                                                    |
|                                        | Added Sugar   | 4.7                                                 | 28  | 25.7                                                    |
| <b>Mixed Dishes, Sides and Entrees</b> | Free Sugar    | 1.2                                                 | 21  | 19.3                                                    |
|                                        | Added Sugar   | 1.3                                                 | 20  | 18.4                                                    |
| <b>Meats, Eggs and Substitutes</b>     | Free Sugar    | 0.3                                                 | 17  | 15.6                                                    |
|                                        | Added Sugar   | 0.3                                                 | 17  | 15.6                                                    |
| <b>Fruits</b>                          | Free Sugar    | 1.5                                                 | 12  | 11                                                      |
|                                        | Added Sugar   | 1.7                                                 | 12  | 11                                                      |
| <b>Other Foods and Beverages</b>       | Free Sugar    | 1.1                                                 | 10  | 9.2                                                     |
|                                        | Added Sugar   | 1.3                                                 | 10  | 9.2                                                     |
| <b>Nuts and Seeds</b>                  | Free Sugar    | 0.1                                                 | 7   | 6.4                                                     |
|                                        | Added Sugar   | 0.1                                                 | 7   | 6.4                                                     |
| <b>Fats, Oils and Vinegars</b>         | Free Sugar    | 0.1                                                 | 5   | 4.6                                                     |
|                                        | Added Sugar   | 0.2                                                 | 5   | 4.6                                                     |
| <b>Soups</b>                           | Free Sugar    | 0.3                                                 | 5   | 4.6                                                     |
|                                        | Added Sugar   | 0.3                                                 | 5   | 4.6                                                     |

|                         |             |   |   |   |
|-------------------------|-------------|---|---|---|
| <b>Vegetables</b>       | Free Sugar  | 0 | 0 | 0 |
|                         | Added Sugar | 0 | 0 | 0 |
| <b>Fish and Seafood</b> | Free Sugar  | 0 | 0 | 0 |
|                         | Added Sugar | 0 | 0 | 0 |

<sup>1</sup>17 categories were adapted from article by Bernstein and colleagues (2016)<sup>17</sup>

<sup>2</sup>*Percent of Free and Added Sugar intake*: Calculation for Free and Added Sugar: was completed by calculating the average of added/free sugar (grams) for 3-days for each participant in the specific category divided by total added/free sugar (grams) times 100.

<sup>3</sup>*Percent of children consuming the category*: This is a calculation of the percent of participants that were included in each category. Total n =109 preschool-aged children.

Confidential

Table 3: Key food source categories of contribution to free and added sugar intake in preschool-aged children in the GFHS pilot studies (a subset of Table 2) with n, mean and confidence intervals for these categories.

| Food source category                  | Type of sugar | n   | Mean intake (g) | 95% CI (g) |
|---------------------------------------|---------------|-----|-----------------|------------|
| <b>Bakery Products</b>                | Free Sugar    | 109 | 9.1             | 8.0 - 10.2 |
|                                       | Added Sugar   | 109 | 9.1             | 8.0 - 10.2 |
| <b>Sugars and Sweets</b>              | Free Sugar    | 84  | 7.5             | 6.3 - 8.7  |
|                                       | Added Sugar   | 84  | 7.5             | 6.3 - 8.6  |
| <b>Cereals and Grain Products</b>     | Free Sugar    | 77  | 4.2             | 3.2 - 5.1  |
|                                       | Added Sugar   | 77  | 4.2             | 3.2 - 5.1  |
| <b>Beverages</b>                      | Free Sugar    | 77  | 10.5            | 8.0 - 12.9 |
|                                       | Added Sugar   | 51  | 6.5             | 4.7 - 8.3  |
| <b>Dairy Products and Substitutes</b> | Free Sugar    | 63  | 3.4             | 2.8 - 4.0  |
|                                       | Added Sugar   | 63  | 3.4             | 2.8 - 4.0  |
| <b>Snacks</b>                         | Free Sugar    | 48  | 1.0             | 0.6 - 1.4  |
|                                       | Added Sugar   | 48  | 1.0             | 0.6 - 1.4  |
| <b>Sauces, Dips and Condiments</b>    | Free Sugar    | 44  | 1.6             | 1.2 - 1.9  |
|                                       | Added Sugar   | 44  | 1.6             | 1.2 - 1.9  |
| <b>Desserts</b>                       | Free Sugar    | 29  | 4.7             | 3.6 - 5.9  |
|                                       | Added Sugar   | 28  | 4.8             | 3.6 - 6.0  |

Key food sources were defined based on those categories that were consumed by at least 25% of the preschool-aged children in the GFHS pilot studies



1  
2  
3  
4  
5  
6  
7  
8  
9  
10  
11  
12  
13  
14  
15  
16  
17  
18  
19  
20  
21  
22  
23  
24  
25  
26  
27  
28  
29  
30  
31  
32  
33  
34  
35  
36  
37  
38  
39  
40  
41  
42  
43  
44  
45  
46  
47  
48  
49  
50  
51  
52  
53  
54  
55  
56  
57  
58  
59  
60

1 Table 4: Cross-sectional associations between added, free and total sugar intakes and  
2 anthropometric measures including body weight, BMI Z-scores, waist circumference and percent  
3 fat mass (n=109).  
4

|                    | Body Weight <sup>1</sup>         |         | BMI Z-scores            |         |
|--------------------|----------------------------------|---------|-------------------------|---------|
|                    | $\beta$ (95% CI)                 | p-value | $\beta$ (95% CI)        | p-value |
| <b>Added Sugar</b> | -0.01 (-0.03, 0.007)             | 0.25    | -0.005 (-0.01, 0.002)   | 0.06    |
| <b>Free Sugar</b>  | -0.011 (-0.01, 0.002)            | 0.08    | -0.004 (-0.008, 0.0006) | 0.09    |
| <b>Total Sugar</b> | -0.004 (-0.01, 0.006)            | 0.45    | -0.001 (-0.005, 0.002)  | 0.07    |
|                    | Waist Circumference <sup>1</sup> |         | Fat Mass <sup>1</sup>   |         |
|                    | $\beta$ (95% CI)                 | p-value | $\beta$ (95% CI)        | p-value |
| <b>Added Sugar</b> | -0.02 (-0.05, 0.008)             | 0.16    | -0.001 (-0.03, 0.03)    | 0.95    |
| <b>Free Sugar</b>  | -0.02 (-0.04, -0.0009)           | 0.04    | -0.003 (-0.03, 0.02)    | 0.82    |
| <b>Total Sugar</b> | -0.009 (-0.02, 0.007)            | 0.28    | 0.0009 (-0.02, 0.02)    | 0.92    |

5  
6  
7  
8  
9  
10  
11  
12  
13  
14  
15  
16  
17  
18  
19  
20  
21  
22  
23  
24  
25  
26  
27  
28  
29  
30  
31  
32  
33  
34  
35  
36  
37  
38  
39  
40  
41  
42  
43  
44  
45  
46  
47  
48  
49  
50  
51  
52  
53  
54  
55  
56  
57  
58  
59  
60

<sup>1</sup>Data has been presented controlling for age and sex for body weight, waist circumference and percent fat mass.

1  
2  
3 **Supplementary Materials:**  
4

5 Table 1: National and global recommendations for free and added sugar intakes for children  
6  
7

| <b>Organization</b>                                              | <b>Free Sugar or Added Sugar Recommendations for Children</b>                                                                                                                                                                                  | <b>Age Group</b>                                      |
|------------------------------------------------------------------|------------------------------------------------------------------------------------------------------------------------------------------------------------------------------------------------------------------------------------------------|-------------------------------------------------------|
| World Health Organization, 2015 <sup>6</sup>                     | “WHO recommends reducing the intake of free sugars to less than 10% of their total energy intake (strong recommendation). WHO suggests a further reduction to below 5% would provide additional health benefits (conditional recommendation).” | Throughout the lifespan (in both adults and children) |
| Health Canada, 2019 <sup>23</sup>                                | “Free sugars: Less than 10% of total energy”                                                                                                                                                                                                   | 2 years or older                                      |
| American Heart Association-Scientific update, 2017 <sup>24</sup> | “Recommend that children consume $\leq 25$ g (100 cal or $\approx 6$ teaspoons) of added sugars per day for children and to avoid added sugars for children $< 2$ years of age.”                                                               | Children from $< 2$ years until 18 years              |

8  
9  
10  
11  
12  
13  
14  
15  
16  
17  
18  
19  
20  
21  
22  
23  
24  
25  
26  
27  
28  
29  
30  
31  
32  
33  
34  
35  
36  
37  
38  
39  
40  
41  
42  
43  
44  
45  
46  
47  
48  
49  
50  
51  
52  
53  
54  
55  
56  
57  
58  
59  
60
